# Supplementary material for: Synthesis, characterization and spectroscopic studies of luminescentl-valine modified alkynyl-based cyclometalated gold(iii) complexes with gelation properties driven by π–π stacking, hydrogen bonding and hydrophobic–hydrophobic interactions
Source: Royal Society of Chemistry journal article supplement (doi:10.1039/c5ce01136a), 2015-01-01
Supplement: c5ce01136a1.pdf [file c5ce01136a1.pdf]

Synthesis, Characterization and Spectroscopic Studies of  
Luminescent L-Valine Modified Alkynyl Based Cyclometalated  
Gold(III) Complexes with Gelation Properties Driven by  $\pi$ - $\pi$   
Stacking, Hydrogen-Bonding and Hydrophobic-Hydrophobic  
Interactions

Steven Kin-Lok Siu, Charlotte Po, King-Chin Yim, Vonika Ka-Man Au and Vivian Wing-Wah Yam\*

Institute of Molecular Functional Materials [Area of Excellence Scheme, University Grants Committee  
(Hong Kong)] and Department of Chemistry,  
The University of Hong Kong, Pokfulam Road, Hong Kong, P. R. China

E-mail: [wwyam@hku.hk](mailto:wwyam@hku.hk)

**Supporting Information**

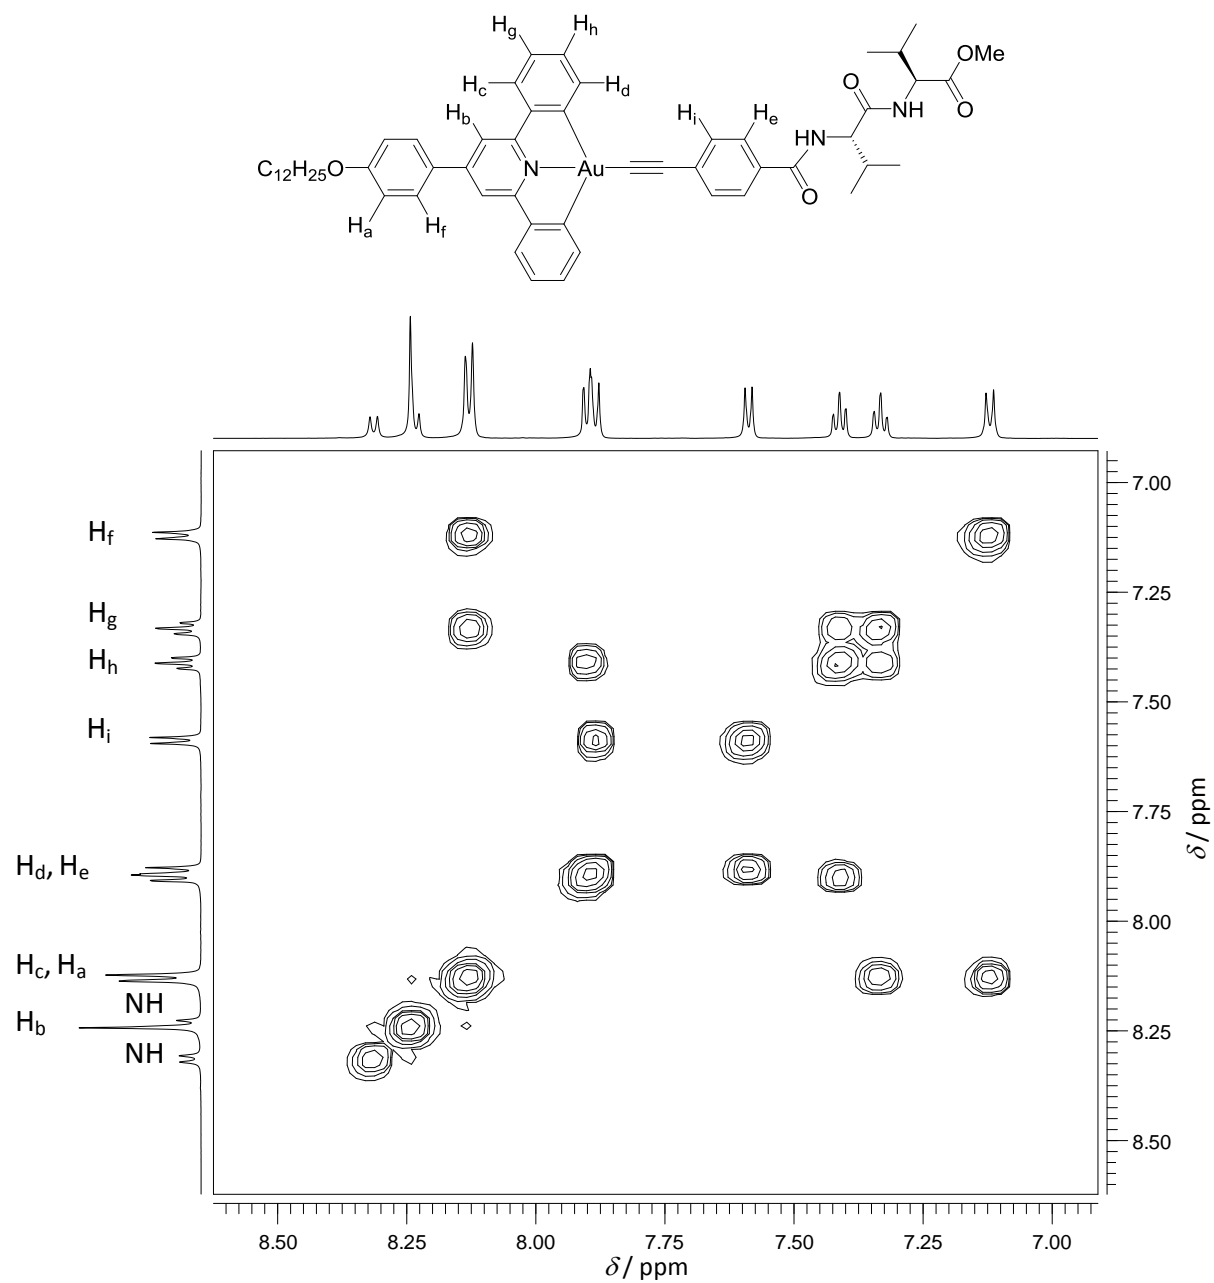

**Figure S1** 2D  $^1\text{H}$ - $^1\text{H}$  COSY NMR spectrum of the complex **7** in  $\text{DMSO-d}_6$ .

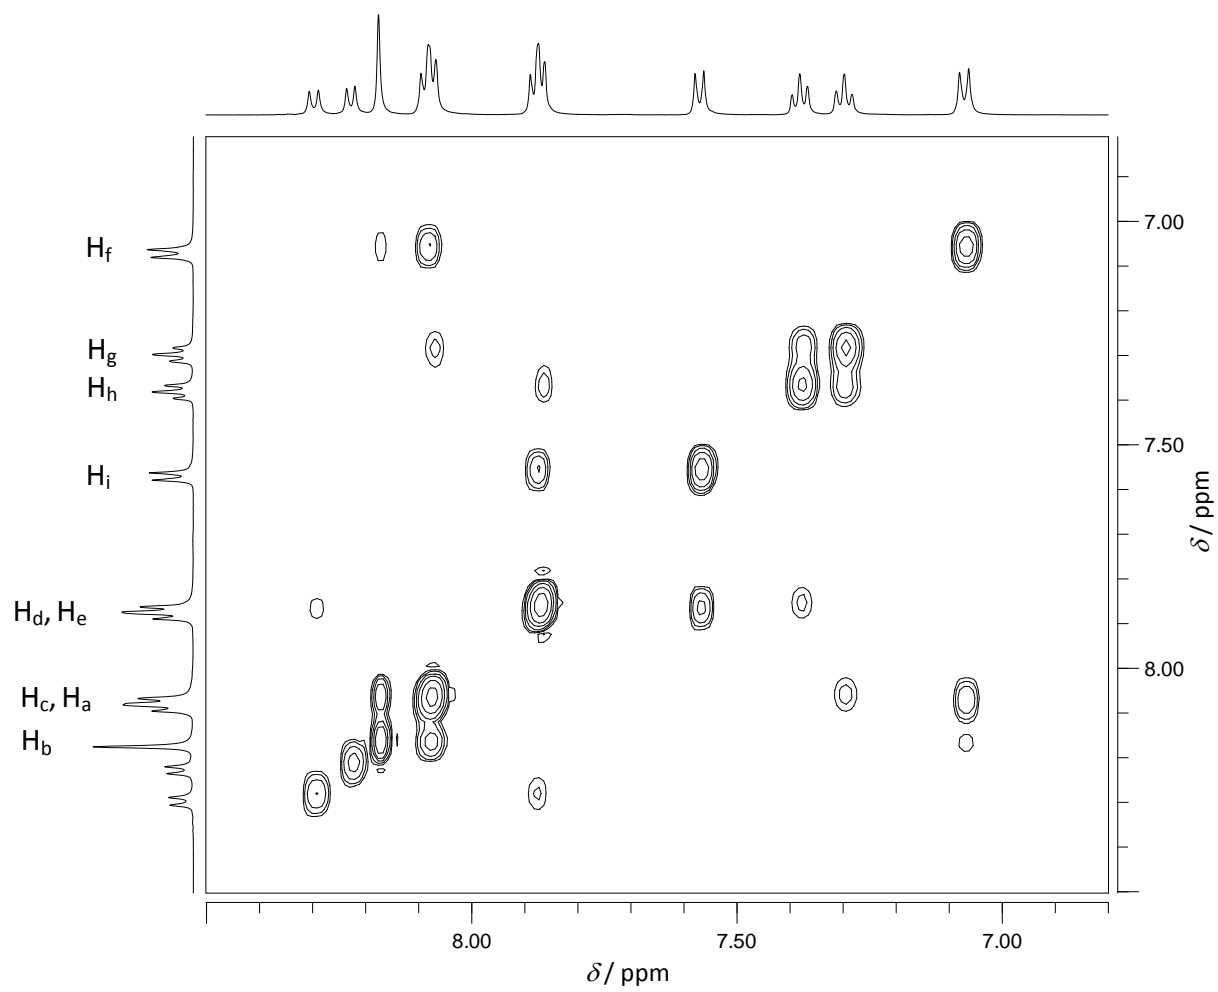

**Figure S2** 2D  $^1\text{H}$ - $^1\text{H}$  NOESY NMR spectrum of the complex **7** in  $\text{DMSO-d}_6$ .

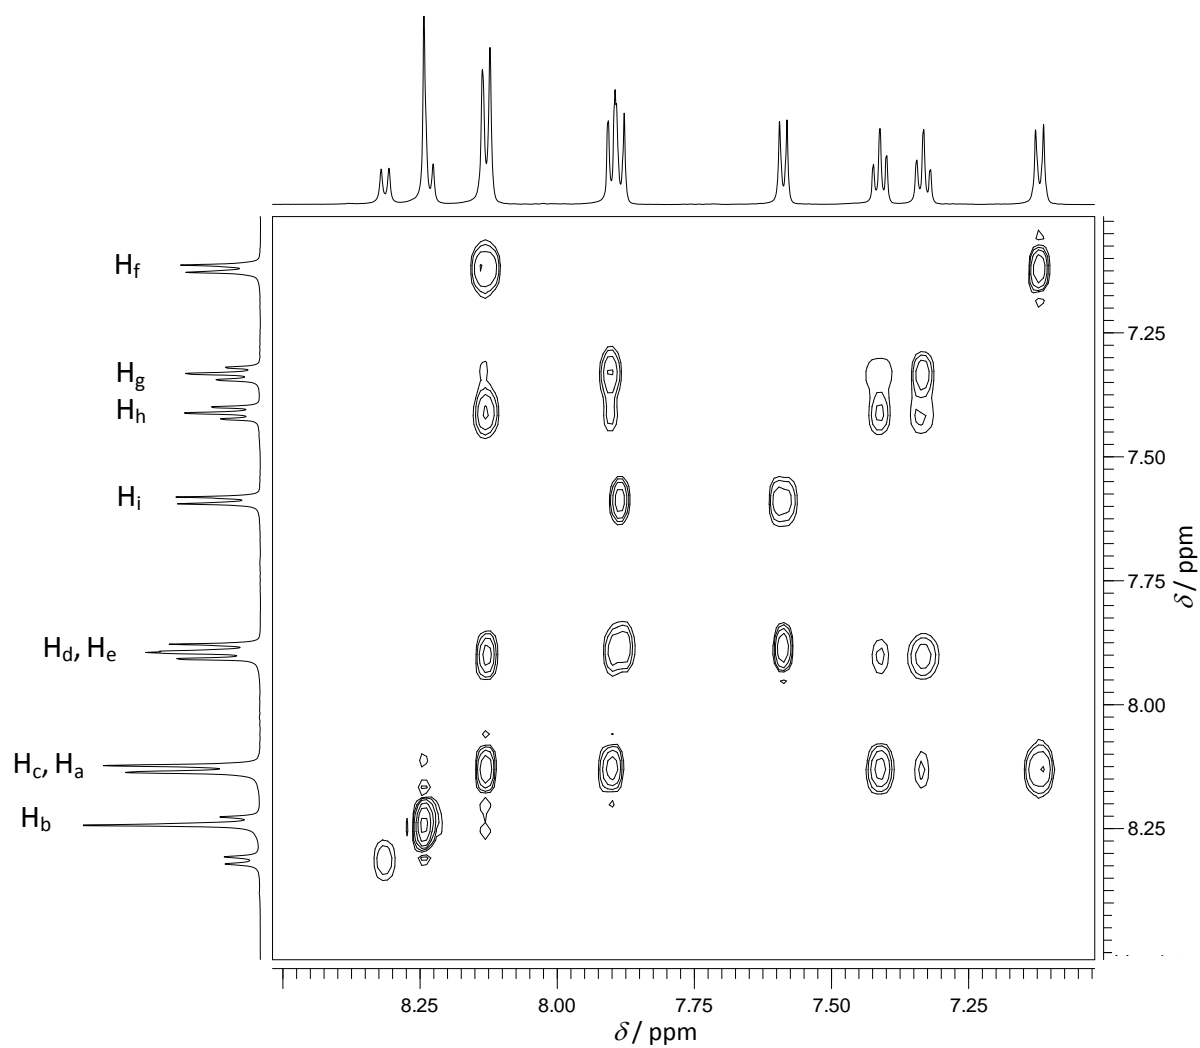

**Figure S3** 2D  $^1\text{H}$ - $^1\text{H}$  TOCSY NMR spectrum of the complex **7** in  $\text{DMSO-d}_6$ .

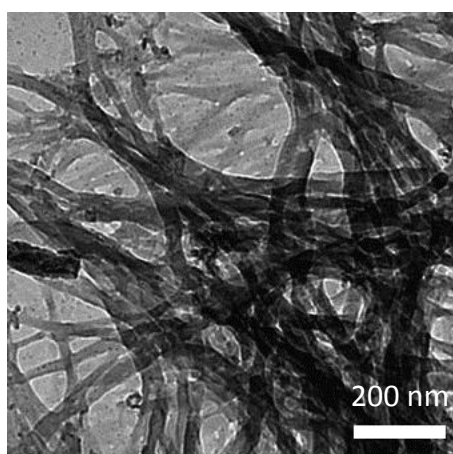

**Figure S4** TEM image of metallogel of complex **5** in  $\text{DMSO}$ .

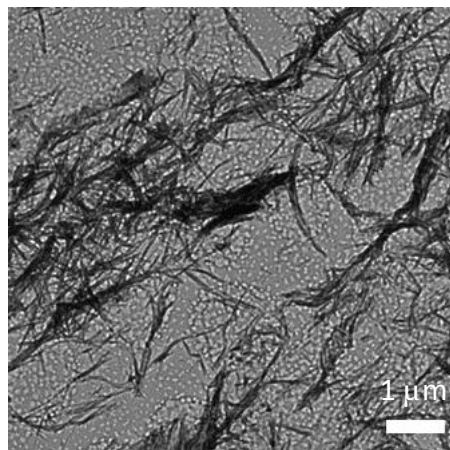

**Figure S5** TEM image of metallogel of complex **8** in DMSO.

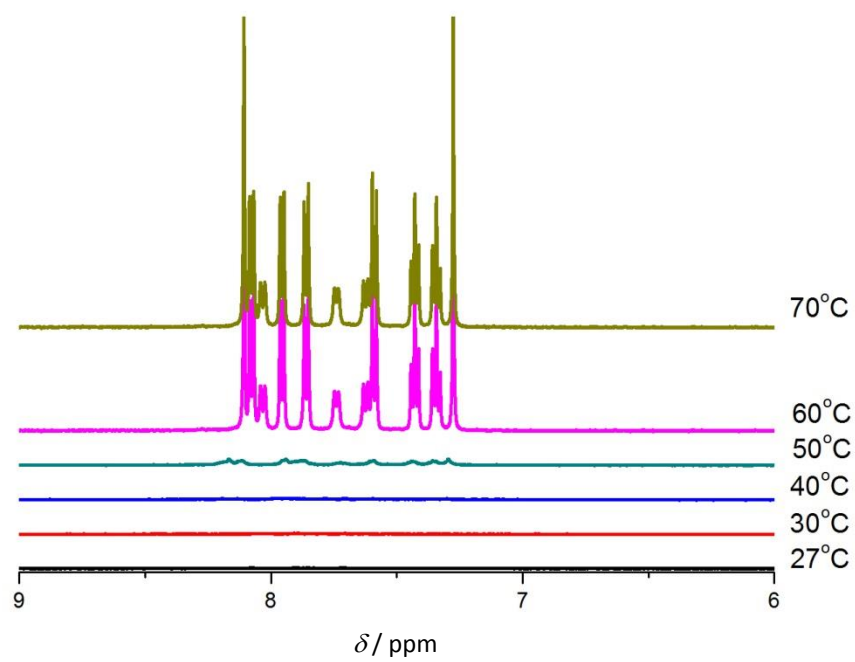

**Figure S6** Variable-temperature <sup>1</sup>H NMR spectra of complex **9** in DMSO-d<sub>6</sub>.

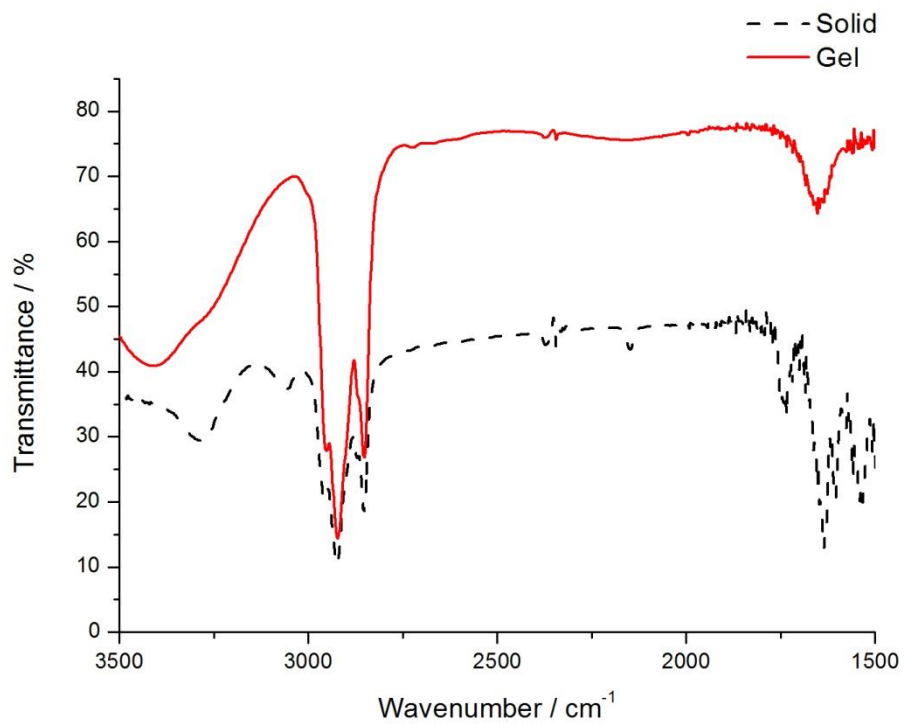

**Figure S7** IR spectra of complex 9 in solid (dotted line) and gel state (solid line).

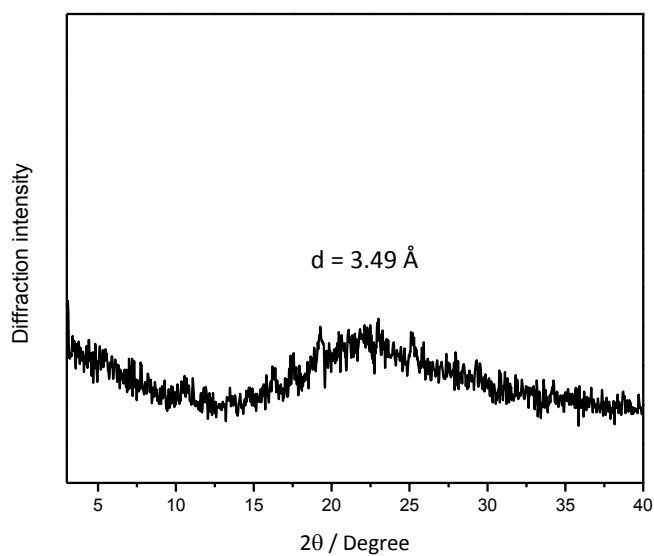

**Figure S8** XRD pattern of complex 7.

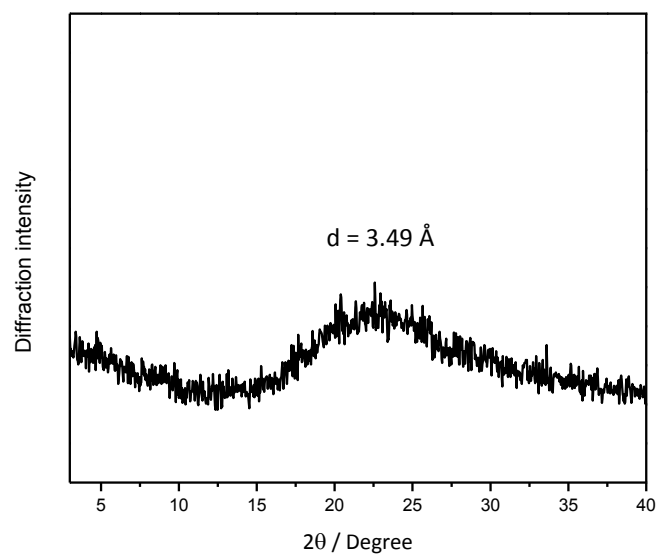

**Figure S9** XRD pattern of complex **9**.
